# Supplementary material for: Flow synthesis of conjugated polymers: exploring the effects of solvent and catalyst on molecular weight
Source: Royal Society of Chemistry journal article supplement (doi:10.1039/d3py00917c), 2023-01-01
Supplement: d3py00917c1.pdf [file d3py00917c1.pdf]

## Supporting information

### Flow Synthesis of Conjugated Polymers: Exploring the Effects of Solvent and Catalyst on Molecular Weight

Jin Woo Jeon and Ye-Jin Hwang\*

Department of Chemistry and Chemical Engineering, Education and Research Center for Smart Energy and Materials, Inha University, 100 Inha-ro, Michuhol-gu, Incheon, Republic of Korea

Phone: (+82)-32-860-7464; Fax: (+82)-32-860-7725; Email: [yjhwang@inha.ac.kr](mailto:yjhwang@inha.ac.kr)

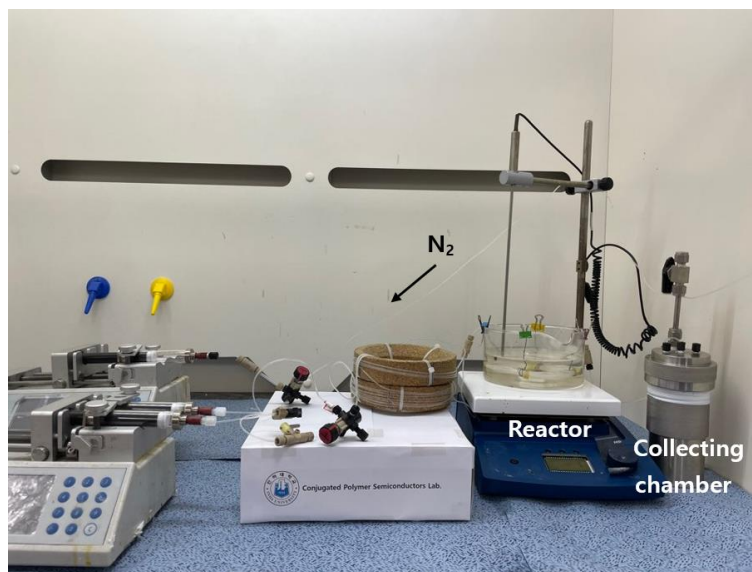

**Figure S1.** An image of the flow synthesis system used in this study.

**Table S1.** Molecular weight and  $\bar{D}$  of PTB7 synthesized by flow system from three times of repeated runs.

| entry          | catalyst                                                  | solvent           | $M_n$ [kDa] | $M_w$ [kDa] | $\bar{D}$ |
|----------------|-----------------------------------------------------------|-------------------|-------------|-------------|-----------|
| 1 <sup>a</sup> | Pd(PPh <sub>3</sub> ) <sub>4</sub>                        | toluene           | 3.13        | 4.25        | 1.36      |
| 2 <sup>a</sup> | Pd(PPh <sub>3</sub> ) <sub>4</sub>                        | toluene           | 3.16        | 4.26        | 1.35      |
| 3 <sup>a</sup> | Pd(PPh <sub>3</sub> ) <sub>4</sub>                        | toluene           | 2.71        | 3.47        | 1.28      |
| 4 <sup>a</sup> | Pd(PPh <sub>3</sub> ) <sub>4</sub>                        | chlorobenzene     | 3.13        | 7.46        | 2.38      |
| 5 <sup>a</sup> | Pd(PPh <sub>3</sub> ) <sub>4</sub>                        | chlorobenzene     | 3.18        | 7.67        | 2.41      |
| 6 <sup>a</sup> | Pd(PPh <sub>3</sub> ) <sub>4</sub>                        | chlorobenzene     | 3.56        | 8.23        | 2.32      |
| 7              | Pd(PPh <sub>3</sub> ) <sub>4</sub>                        | o-xylene          | 3.29        | 7.20        | 2.19      |
| 8              | Pd(PPh <sub>3</sub> ) <sub>4</sub>                        | o-xylene          | 3.49        | 8.42        | 2.41      |
| 9              | Pd(PPh <sub>3</sub> ) <sub>4</sub>                        | o-xylene          | 3.25        | 7.47        | 2.30      |
| 10             | Pd(PPh <sub>3</sub> ) <sub>4</sub>                        | toluene/DMF       | 59.54       | 146.34      | 2.46      |
| 11             | Pd(PPh <sub>3</sub> ) <sub>4</sub>                        | toluene/DMF       | 55.12       | 125.32      | 2.27      |
| 12             | Pd(PPh <sub>3</sub> ) <sub>4</sub>                        | toluene/DMF       | 58.12       | 123.12      | 2.12      |
| 13             | Pd(PPh <sub>3</sub> ) <sub>4</sub>                        | chlorobenzene/DMF | 53.59       | 106.08      | 1.98      |
| 14             | Pd(PPh <sub>3</sub> ) <sub>4</sub>                        | chlorobenzene/DMF | 55.24       | 116.81      | 2.12      |
| 15             | Pd(PPh <sub>3</sub> ) <sub>4</sub>                        | chlorobenzene/DMF | 52.80       | 113.76      | 2.16      |
| 16             | Pd(PPh <sub>3</sub> ) <sub>4</sub>                        | o-xylene/DMF      | 58.70       | 132.10      | 2.25      |
| 17             | Pd(PPh <sub>3</sub> ) <sub>4</sub>                        | o-xylene/DMF      | 55.97       | 127.97      | 2.29      |
| 18             | Pd(PPh <sub>3</sub> ) <sub>4</sub>                        | o-xylene/DMF      | 61.34       | 145.90      | 2.38      |
| 19             | Pd <sub>2</sub> (dba) <sub>3</sub> +P(o-tol) <sub>3</sub> | toluene           | 42.44       | 92.41       | 2.18      |

|    |                                                           |                   |       |        |      |
|----|-----------------------------------------------------------|-------------------|-------|--------|------|
| 20 | Pd <sub>2</sub> (dba) <sub>3</sub> +P(o-tol) <sub>3</sub> | toluene           | 46.17 | 106.71 | 2.31 |
| 21 | Pd <sub>2</sub> (dba) <sub>3</sub> +P(o-tol) <sub>3</sub> | toluene           | 44.16 | 88.81  | 2.01 |
| 22 | Pd <sub>2</sub> (dba) <sub>3</sub> +P(o-tol) <sub>3</sub> | chlorobenzene     | 55.16 | 130.47 | 2.37 |
| 23 | Pd <sub>2</sub> (dba) <sub>3</sub> +P(o-tol) <sub>3</sub> | chlorobenzene     | 50.59 | 109.32 | 2.16 |
| 24 | Pd <sub>2</sub> (dba) <sub>3</sub> +P(o-tol) <sub>3</sub> | chlorobenzene     | 48.65 | 94.81  | 1.95 |
| 25 | Pd <sub>2</sub> (dba) <sub>3</sub> +P(o-tol) <sub>3</sub> | o-xylene          | 40.98 | 77.92  | 1.90 |
| 26 | Pd <sub>2</sub> (dba) <sub>3</sub> +P(o-tol) <sub>3</sub> | o-xylene          | 43.79 | 90.19  | 2.06 |
| 27 | Pd <sub>2</sub> (dba) <sub>3</sub> +P(o-tol) <sub>3</sub> | o-xylene          | 40.23 | 87.13  | 2.17 |
| 28 | Pd <sub>2</sub> (dba) <sub>3</sub> +P(o-tol) <sub>3</sub> | toluene/DMF       | 15.45 | 66.14  | 4.28 |
| 29 | Pd <sub>2</sub> (dba) <sub>3</sub> +P(o-tol) <sub>3</sub> | toluene/DMF       | 14.79 | 62.00  | 4.19 |
| 30 | Pd <sub>2</sub> (dba) <sub>3</sub> +P(o-tol) <sub>3</sub> | toluene/DMF       | 14.82 | 61.10  | 4.12 |
| 31 | Pd <sub>2</sub> (dba) <sub>3</sub> +P(o-tol) <sub>3</sub> | chlorobenzene/DMF | 11.65 | 51.96  | 4.46 |
| 32 | Pd <sub>2</sub> (dba) <sub>3</sub> +P(o-tol) <sub>3</sub> | chlorobenzene/DMF | 11.00 | 42.25  | 3.84 |
| 33 | Pd <sub>2</sub> (dba) <sub>3</sub> +P(o-tol) <sub>3</sub> | chlorobenzene/DMF | 10.03 | 39.78  | 3.97 |
| 34 | Pd <sub>2</sub> (dba) <sub>3</sub> +P(o-tol) <sub>3</sub> | o-xylene/DMF      | 12.58 | 45.05  | 3.58 |
| 35 | Pd <sub>2</sub> (dba) <sub>3</sub> +P(o-tol) <sub>3</sub> | o-xylene/DMF      | 12.50 | 46.51  | 3.72 |
| 36 | Pd <sub>2</sub> (dba) <sub>3</sub> +P(o-tol) <sub>3</sub> | o-xylene/DMF      | 12.26 | 47.33  | 3.86 |

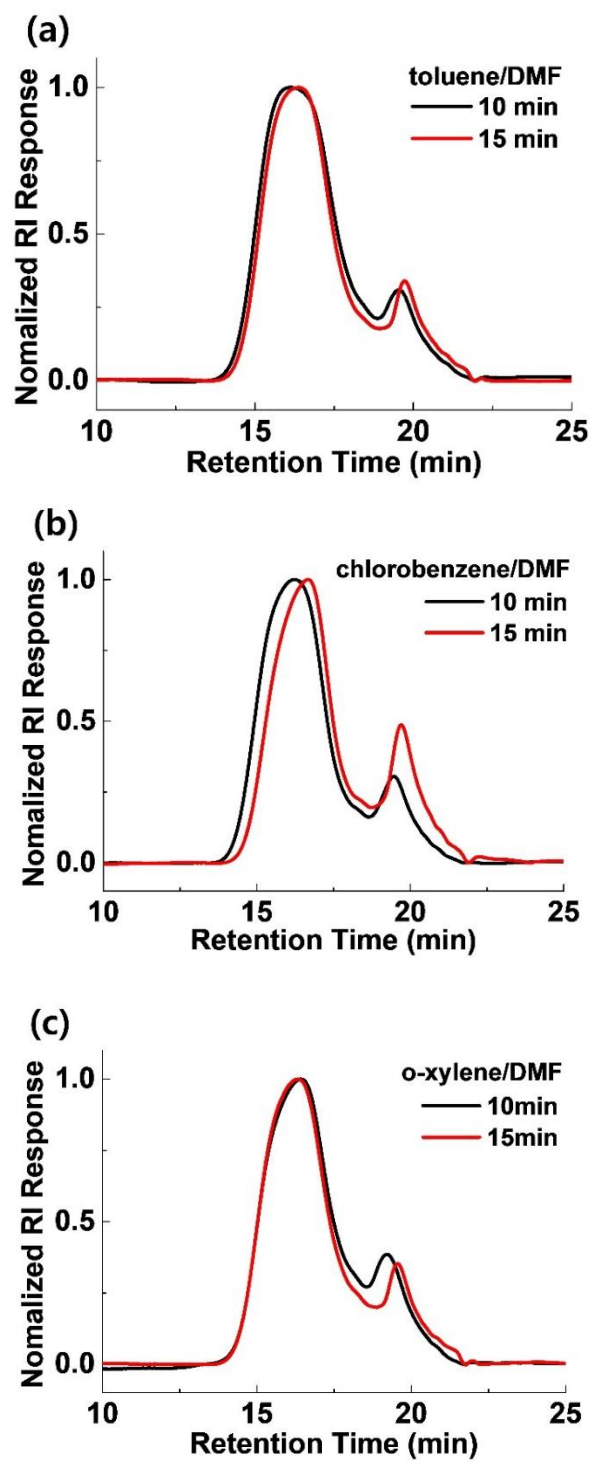

**Figure S2.** GPC traces of PTB7 synthesized for 10 and 15 min by using  $\text{Pd}_2(\text{dba})_3/\text{P}(\text{o-tol})_3$  (a) in a toluene/DMF, (b) in a chlorobenzene/DMF, and (c) in a o-xylene/DMF.

**Table S2.** Molecular weight and  $\bar{D}$  of PTB7 synthesized for 15 min by using  $\text{Pd}_2(\text{dba})_3/\text{P}(\text{o-tol})_3$ .

| entry | solvent           | reaction time [min] | $M_n$ [kDa] | $M_w$ [kDa] | $\bar{D}$ |
|-------|-------------------|---------------------|-------------|-------------|-----------|
| 1     | toluene/DMF       | 15                  | 11.41       | 56.55       | 4.96      |
| 2     | chlorobenzene/DMF | 15                  | 9.45        | 47.41       | 5.03      |
| 3     | o-xylene/DMF      | 15                  | 11.12       | 53.15       | 4.78      |

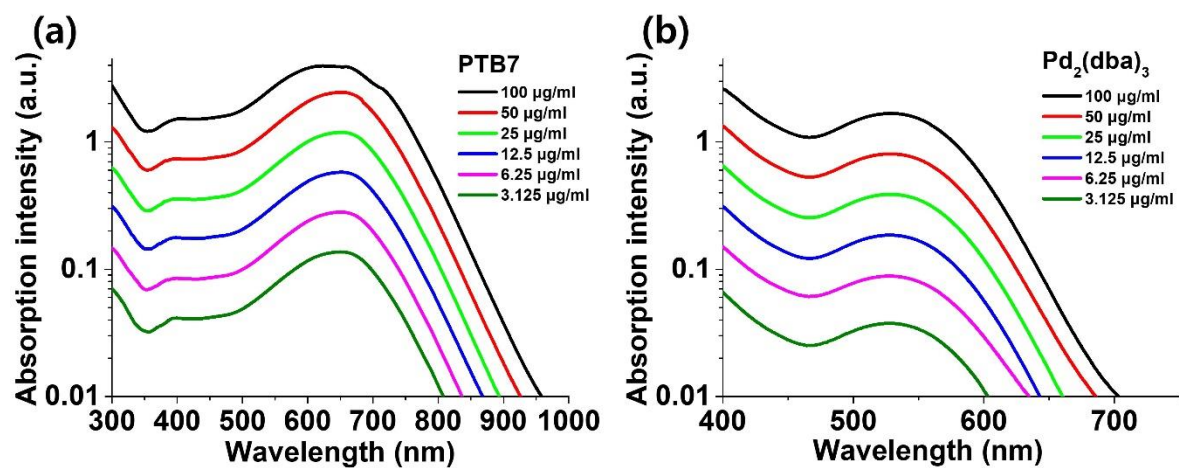

**Figure S3.** Absorption spectra of standard solutions of (a) PTB7 and (b)  $\text{Pd}_2(\text{dba})_3$ , respectively.

**Table S3.** Hansen parameters of the solvents and polymer. Parameters of the PTB7 is gained from Manley et al.<sup>[1]</sup> The others are from Barton.<sup>[2]</sup>

| materials     | $\delta_d$ | $\delta_p$ | $\delta_h$ |
|---------------|------------|------------|------------|
| toluene       | 18.0       | 1.4        | 2.0        |
| chlorobenzene | 19.0       | 4.3        | 2.0        |
| o-xylene      | 17.8       | 1.0        | 3.1        |
| PTB7          | 21.05      | 2.18       | 5.92       |

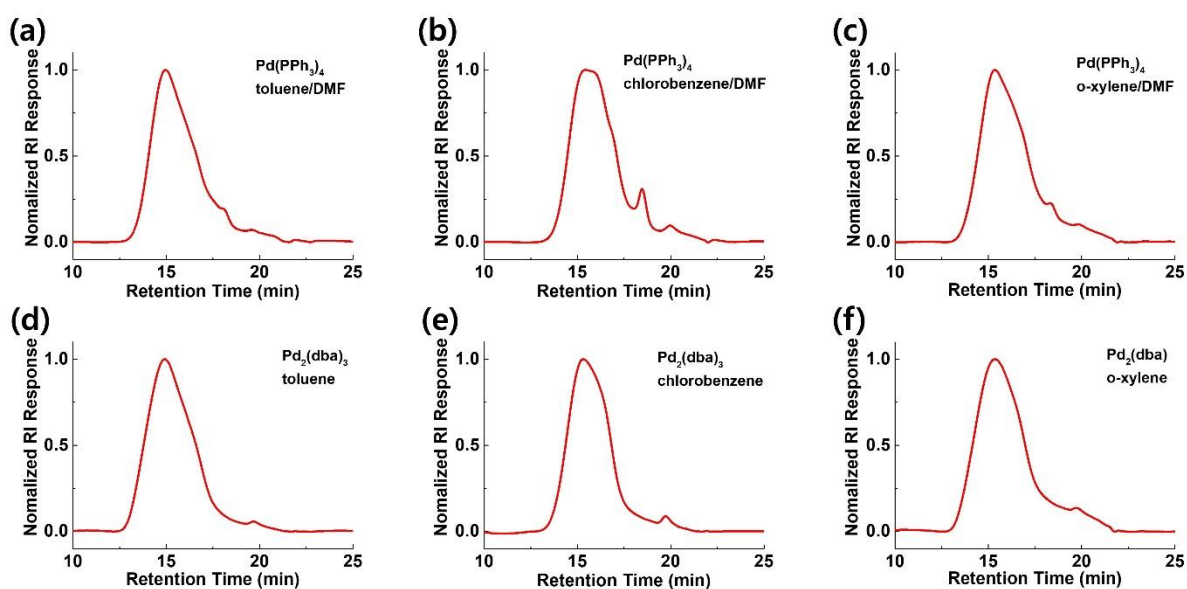

**Figure S4.** GPC traces of PTB7 synthesized by batch reactor using (a) Pd(PPh<sub>3</sub>)<sub>4</sub> with toluene/DMF, (b) Pd(PPh<sub>3</sub>)<sub>4</sub> with chlorobenzene/DMF, (c) Pd(PPh<sub>3</sub>)<sub>4</sub> with o-xylene/DMF, (d) Pd<sub>2</sub>(dba)<sub>3</sub>/P(o-tol)<sub>3</sub> with toluene, (e) Pd<sub>2</sub>(dba)<sub>3</sub>/P(o-tol)<sub>3</sub> with chlorobenzene, and (f) Pd<sub>2</sub>(dba)<sub>3</sub>/P(o-tol)<sub>3</sub> with o-xylene/DMF.

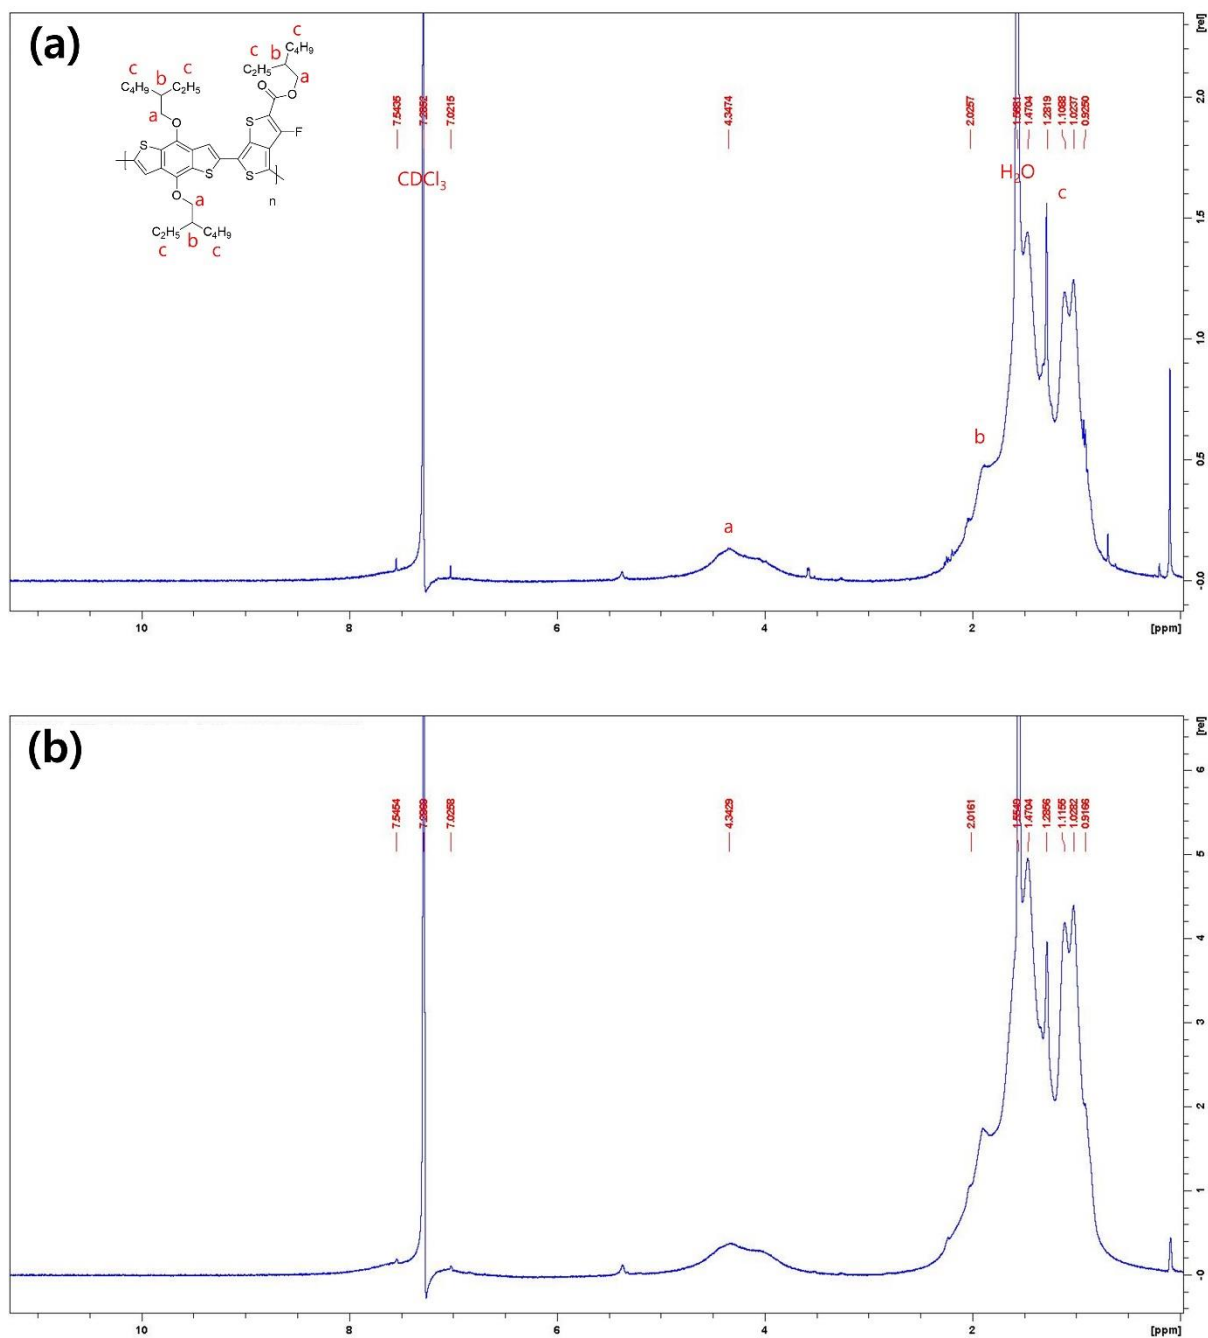

**Figure S5.** <sup>1</sup>H-NMR graph of PTB7 (a) synthesized by flow system, and (b) purchased from Sigma Aldrich.

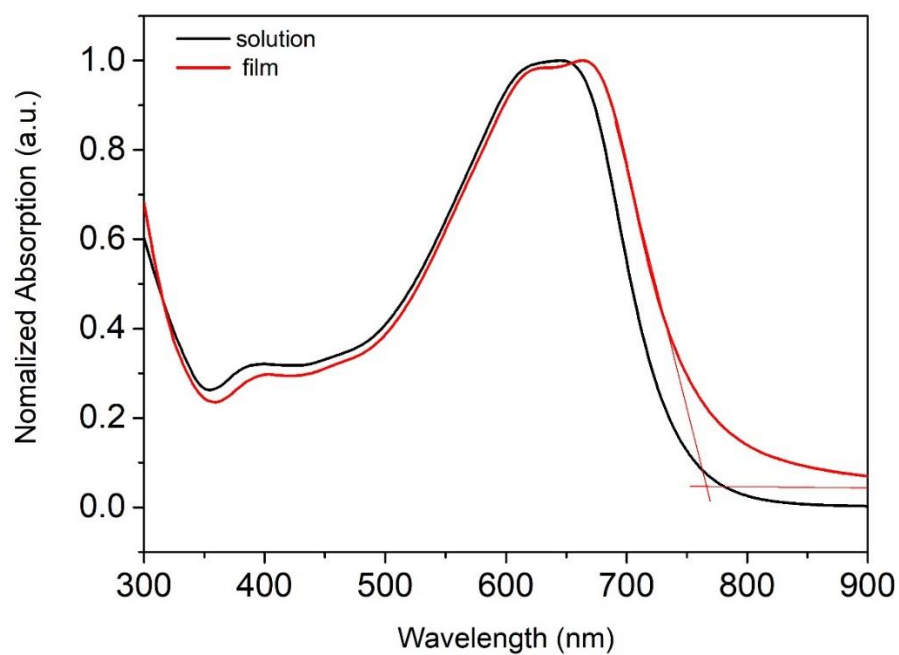

**Figure S6.** UV-vis absorption spectra of solution and film of PTB7 synthesized by flow system.

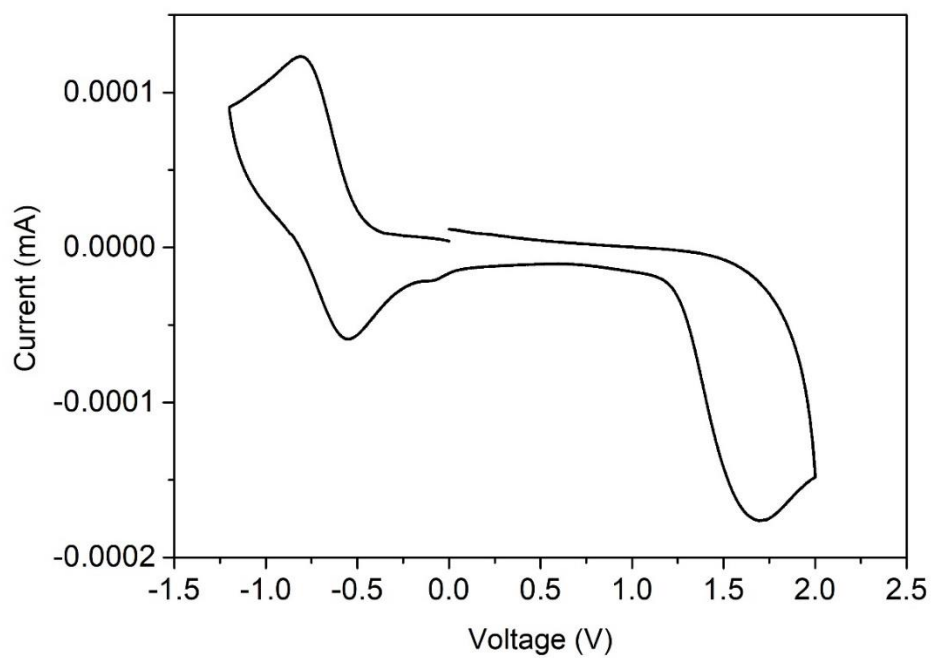

**Figure S7.** Cyclic voltammogram for PTB7 synthesized by flow system.



**Table S4.** Optical and electrochemical properties of PTB7 synthesized by flow system.

| polymer | $\lambda_{\max}^{\text{sol}}$<br>[nm] | $\lambda_{\max}^{\text{film}}$<br>[nm] | $\lambda_{\text{on}}^{\text{film}}$<br>[nm] | $E_g^{\text{optical}}$<br>[eV] <sup>a</sup> | HOMO<br>[eV] | LUMO<br>[eV] | $E_g^{\text{electrical}}$<br>[eV] |
|---------|---------------------------------------|----------------------------------------|---------------------------------------------|---------------------------------------------|--------------|--------------|-----------------------------------|
| PTB7    | 645                                   | 664                                    | 767                                         | 1.62                                        | -5.41        | -3.62        | 1.79                              |

<sup>a</sup> Optical energy band gap was measured on film.

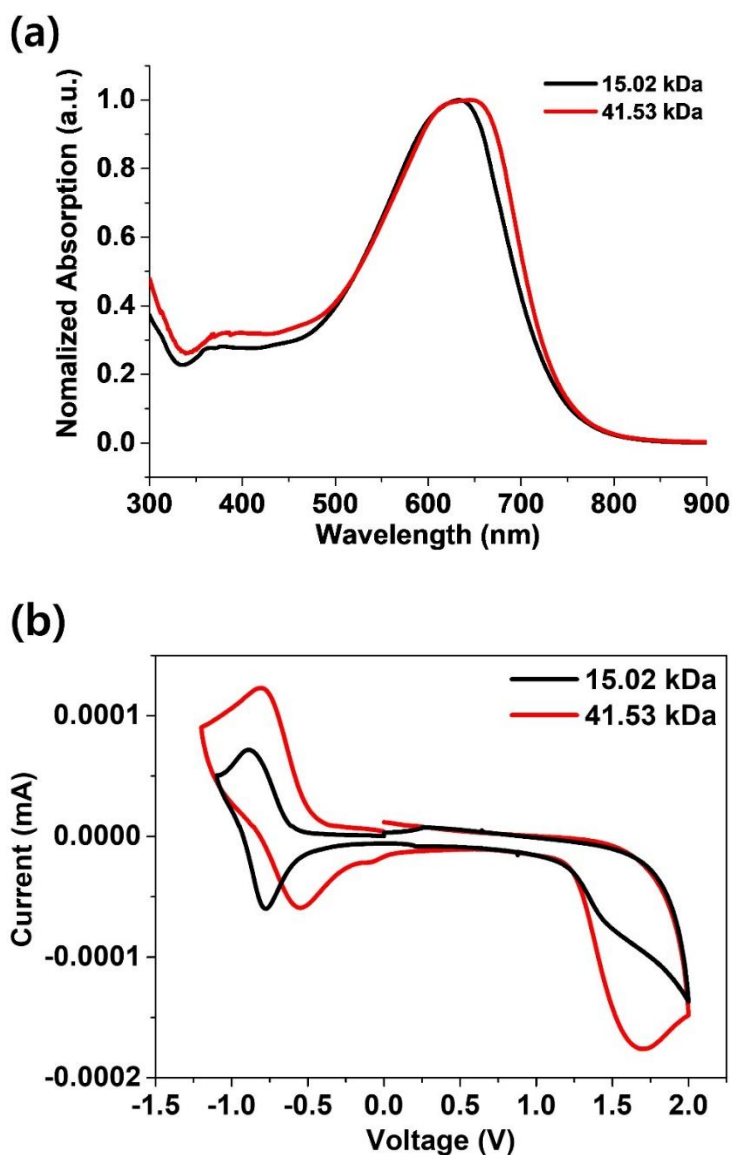

**Figure S8.** (a) UV-vis absorption spectra of PTB7 thin film and (b) Cyclic voltammogram of PTB7 in two different molecular weights.

**Table S5.** Optical and electrochemical properties of PTB7 in two different molecular weights.

| Entry | $M_n$ [kDa] | $\lambda_{\max}^{\text{sol}}$ [nm] | $\lambda_{\text{on}}^{\text{sol}}$ [nm] | HOMO [eV] | LUMO [eV] | $E_g^{\text{electrical}}$ [eV] |
|-------|-------------|------------------------------------|-----------------------------------------|-----------|-----------|--------------------------------|
| 1     | 15.02       | 633                                | 737                                     | -5.51     | -3.65     | 1.86                           |
| 2     | 41.53       | 645                                | 748                                     | -5.41     | -3.62     | 1.79                           |

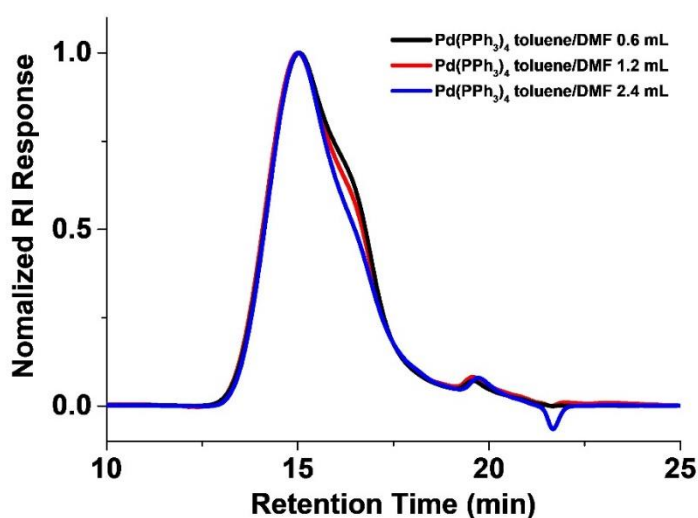

**Figure S9.** GPC traces of PTB7 synthesized in various reaction volumes.

**Table S6.** Molecular weight and  $\bar{D}$  of PTB7 synthesized in various reaction volumes.

| reaction volume [mL] | reaction time [min] | $M_n$ [kDa] | $M_w$ [kDa] | $\bar{D}$ |
|----------------------|---------------------|-------------|-------------|-----------|
| 1.2                  | 10                  | 57.59       | 131.59      | 2.28      |
| 0.6                  | 10                  | 58.25       | 129.69      | 2.23      |
| 2.4                  | 10                  | 54.31       | 126.08      | 2.32      |

## Reference

- [1] E. F. Manley, J. Strzalka, T. J. Fauvell, N. E. Jackson, M. J. Leonardi, N. D. Eastham, T. J. Marks, L. X. Chen, *Adv. Mater.* **2017**, *29*.
- [2] A. F. Barton, *Chem. Rev.* **1975**, *75*, 731-753.
